# Supplementary material
Source: Springer Nature journal article supplement (https://www.springermedizin.de/resource/supplementary/12876_2012_906_MOESM1_ESM.pdf/9438026)

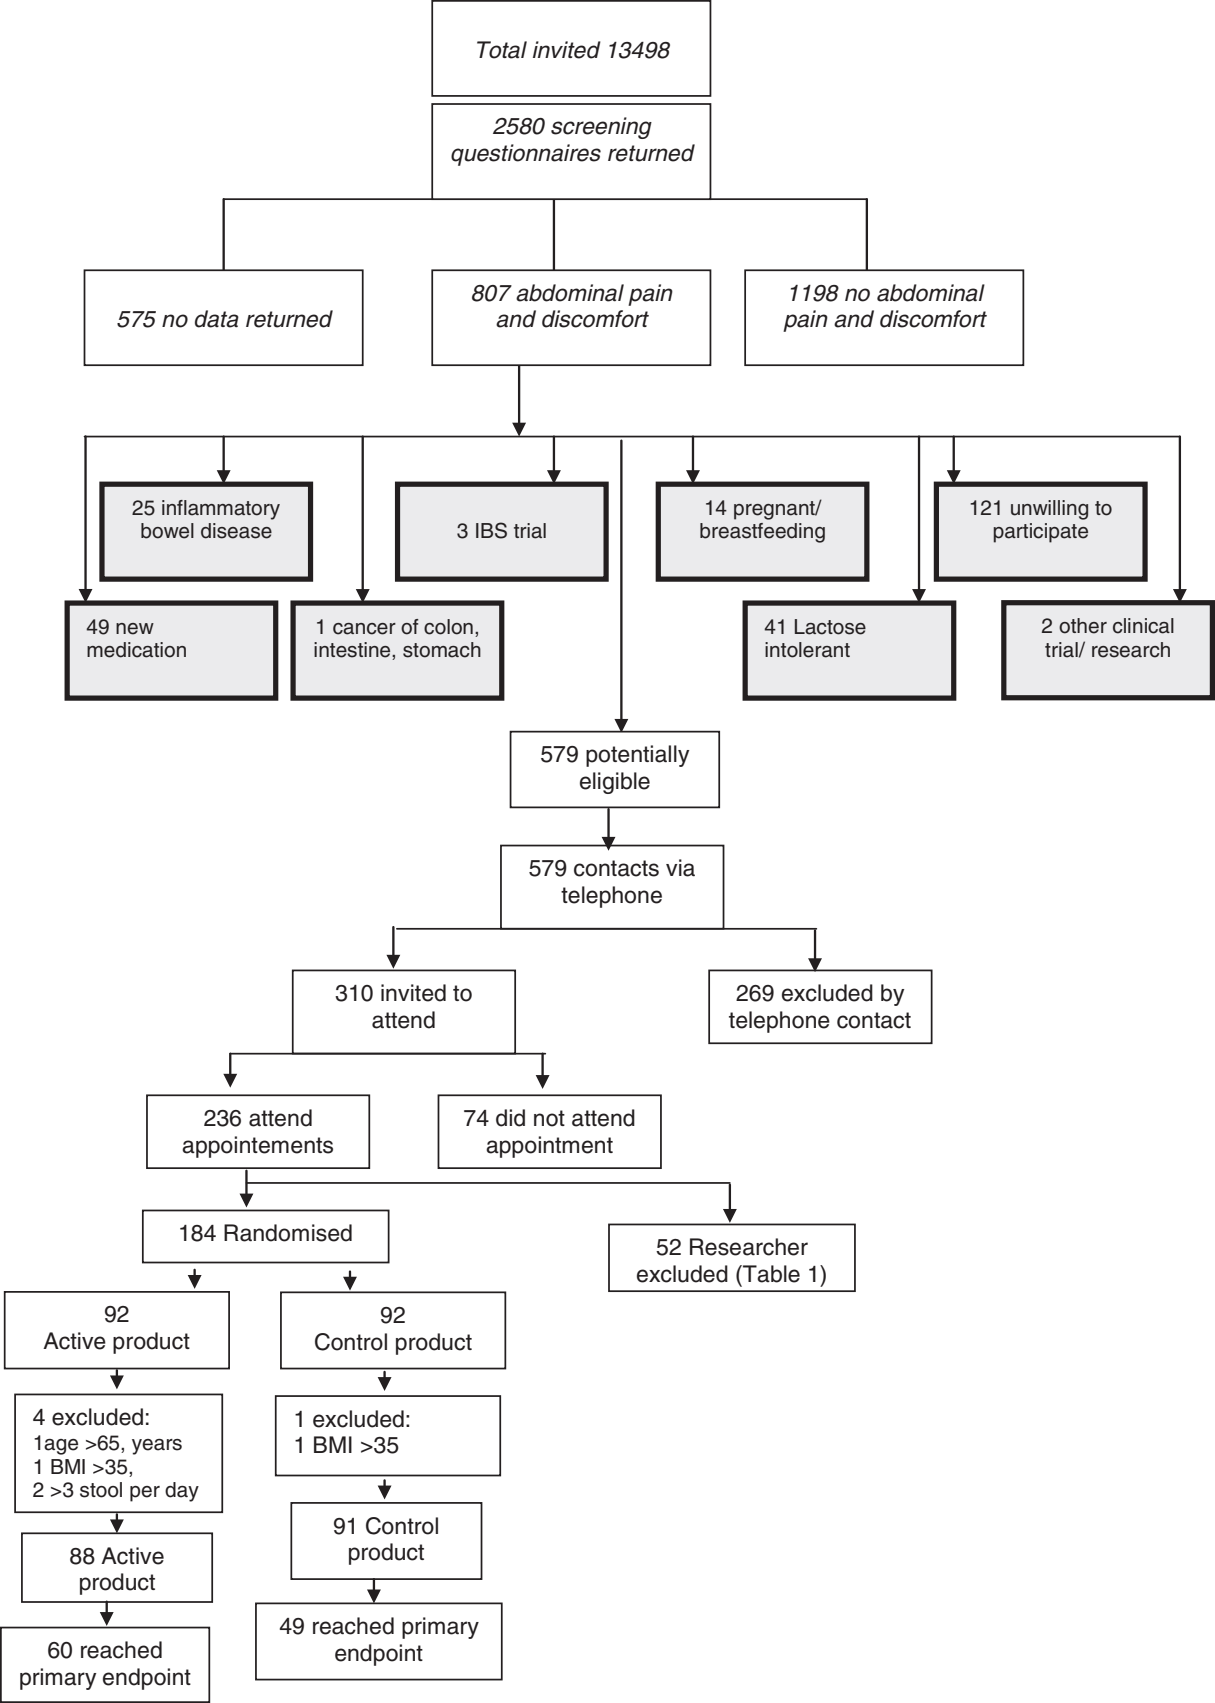

Supplement: MOESM1 [file 9438026]
